# Supplementary material for: Constraining GRACE-derived cryosphere-attributed signal to irregularly shaped ice-covered areas
Source: Copernicus journal article supplement (doi:10.5194/tc-7-1901-2013), 2013-12-17
Supplement: Supplementary file 1 [file tc-7-1901-2013-supplement.zip]

Archive with 2 entries (2 files):
- Animation_1.mov
- animation_caption.pdf
