# Supplementary material for: Constraining GRACE-derived cryosphere-attributed signal to irregularly shaped ice-covered areas
Source: Copernicus journal article supplement (doi:10.5194/tc-7-1901-2013), 2013-12-17
Supplement: Supplementary file 1 [file tc-7-1901-2013-supplement.zip › animation_caption.pdf]

**Animation 1** - A sample Monte Carlo inversion to convergence over 85 iterations. This is 1 of the 1000 simulations comprising the ensemble mean presented in Figure 10. The layout of subplots and color scale limits follow Figure 10. **A:** Inferred rate of mass change field at ice-containing nodes ( $\dot{m}$ ). **B:** Gaussian smoothing ( $\sigma = 200$  km) of the inferred rate of mass change field ( $\dot{M}$ ). **C:** Spherical harmonic representation of the trend in GRACE-derived cryosphere-attributed rate of mass change ( $\dot{M}^G$ ). **D:** Difference between  $\dot{M}^G$  and  $\dot{M}$  ( $\Delta$ ). Black contour lines denote irregularly shaped ice-containing nodes within the domain.
